# Supplementary material for: Impact of channel nanostructures of porous carbon particles on their catalytic performance
Source: Royal Society of Chemistry journal article supplement (doi:10.1039/d3nr05384a), 2023-12-12
Supplement: d3nr05384a1.pdf [file d3nr05384a1.pdf]

## Supporting Information

### Impact of Channel Nanostructures of Porous Carbon Particles on Their Catalytic Performance

*Hyunkyu Oh<sup>1,†</sup>, Young Jun Lee<sup>2,†</sup>, Eun Ji Kim<sup>1</sup>, Jinseok Park<sup>1</sup>, Hee-Eun Kim<sup>1</sup>, Hyunsoo Lee<sup>1</sup>, Hyunjoo Lee<sup>1</sup>, and Bumjoon J. Kim<sup>1,\*</sup>*

<sup>†</sup>These authors contributed equally to this work.

<sup>1</sup>*Department of Chemical and Biomolecular Engineering, Korea Advanced Institute of Science and Technology (KAIST), Daejeon 34141, Republic of Korea*

<sup>2</sup>*Carbon Composite Materials Research Center, Korea Institute of Science and Technology, 92 Chudong-ro, Bongdong-eup, Wanju-gun, Jeonbuk 55324, Republic of Korea*

\*E-mail: bumjoonkim@kaist.ac.kr (B. J. K.)

## Table of Contents

### ■ Supporting Figures S1-S7

**Fig. S1** SEM images of BCP particles at different evaporation conditions. (a)  $\varphi = 0.04 \text{ h}^{-1}$ , (b)  $\varphi = 0.09 \text{ h}^{-1}$ , (c)  $\varphi = 0.33 \text{ h}^{-1}$ , (d)  $\varphi = 1.18 \text{ h}^{-1}$ .

**Fig. S2** SEM images of (a) PCP1, (b) PCP2, (c) PCP3 and (d) PCP4.

**Fig. S3** TEM images of PCP-PtFe catalysts: (a) PCP1-PtFe, (b) PCP2-PtFe, (c) PCP3-PtFe, and (d) PCP4-PtFe.

**Fig. S4** SEM images of PCP-PtFe catalysts: (a) PCP1-PtFe, (b) PCP2-PtFe, (c) PCP3-PtFe, and (d) PCP4-PtFe.

**Fig. S5** (a) TEM image, (b) high-resolution TEM image, (c) HAADF-STEM image, and (d-f) EDS mapping of the PCP4-PtFe catalyst: (d) Pt (red), (e) Fe (green), and (f) their overlay. The observed ratio of Pt and Fe is 1:3.

**Fig. S6** UV-Vis absorption spectra of PCP4-PtFe catalyst, PCP4-Pt, PCP4-Fe, and PCP4-w/o PtFe for OPD oxidation.

**Fig. S7** (a) Scheme for the anionic polymerization, (b) SEC, and (c)  $^1\text{H}$  NMR spectra of PS-*b*-PDMS.

### ■ Supporting Tables S1-S2

**Table S1.** Structural characteristics of PCP

**Table S2.** Elemental analysis of PCP-PtFe catalyst

## Supplementary Note 1

$$\text{Amount of DAP produced} = \frac{\text{Absorbance}}{\text{molar absorption coefficient} * \text{optical path length (cm)}} \quad (1)$$

By applying the Beer-Lambert Law (equation (1)), the amount of DAP produced can be calculated from the UV-Vis spectrum (DAP's molar absorption coefficient =  $1.67 \times 10^4 \text{ M}^{-1}\text{cm}^{-1}$  and the optical path length = 1 cm).<sup>1</sup> As DAP at a concentration of 1 M is generated from the reactant OPD at 2 M, the residual concentration of OPD over time can be determined. Plotting  $1/[\text{OPD}]$  against time results in a linear graph, where the slope of this line represents the second-order reaction rate constant,  $k$  ( $\text{mM}^{-1}\text{s}^{-1}$ ), of OPD. The equation used for calculating  $1/[\text{OPD}]$  is as follows:

$$\frac{1}{[\text{OPD}]} = \frac{1}{0.67 \text{ mM} - \left( \frac{\text{Absorbance of DAP}}{1.67 \times 10^4 \text{ mM}^{-1}\text{cm}^{-1}} \times 2 \right)} \quad (2)$$

This equation assumes the conversion of 2OPD to DAP and sets a total concentration of 0.67 mM, where the total concentration is based on 100  $\mu\text{L}$  of 0.02 M OPD in 3 mL.

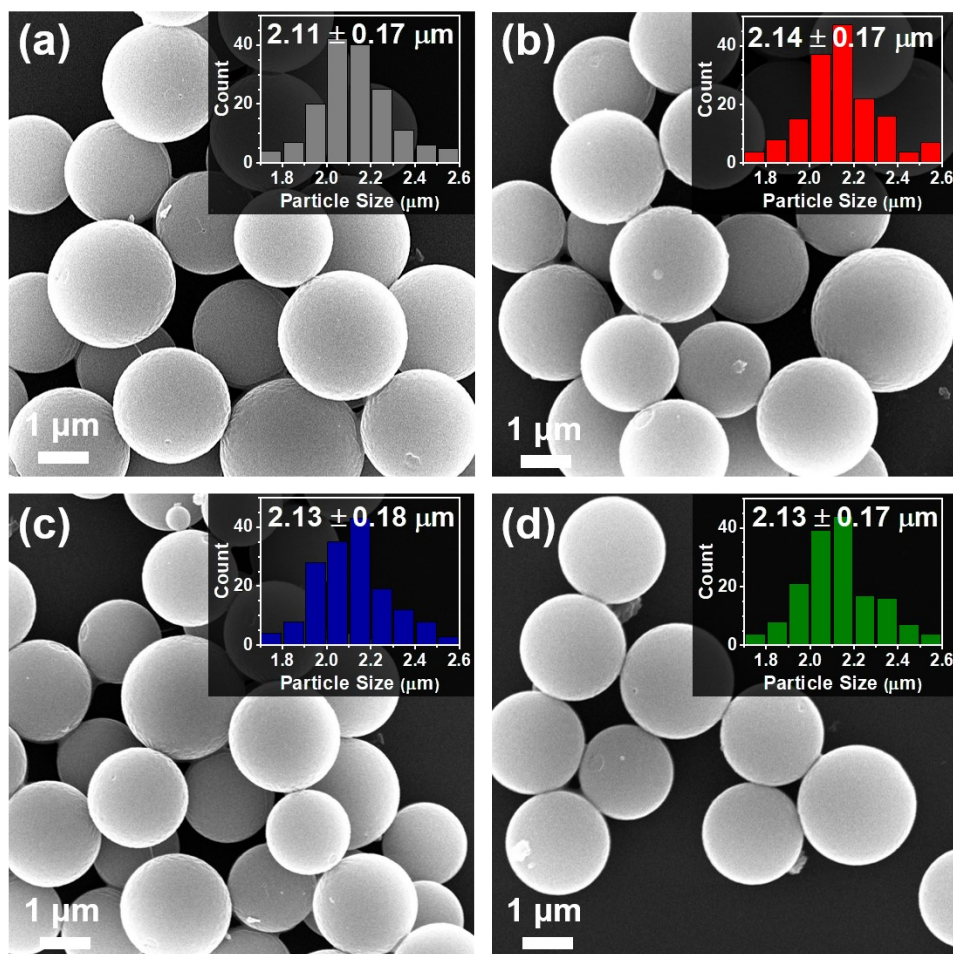

**Fig. S1** SEM images of BCP particles at different chloroform evaporation conditions. (a)  $\varphi = 0.04 \text{ h}^{-1}$ , (b)  $\varphi = 0.09 \text{ h}^{-1}$ , (c)  $\varphi = 0.33 \text{ h}^{-1}$ , (d)  $\varphi = 1.18 \text{ h}^{-1}$ .

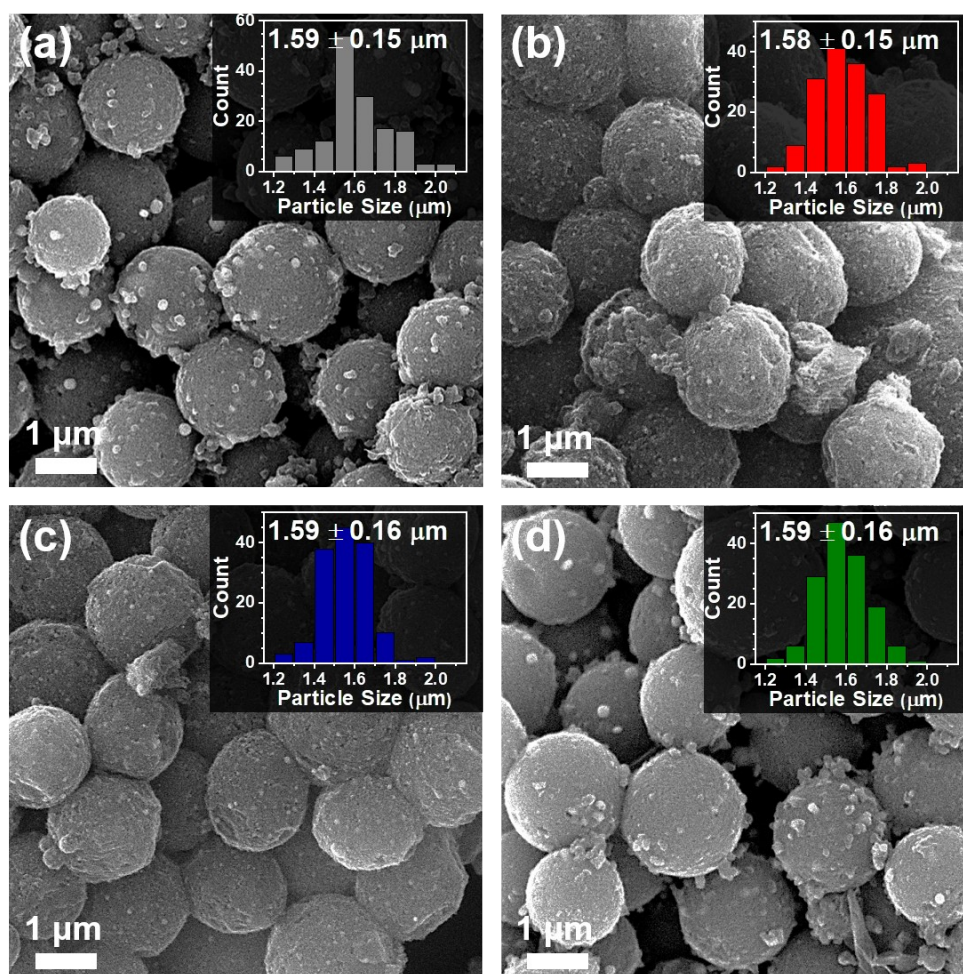

**Fig. S2** SEM images of (a) PCP1, (b) PCP2, (c) PCP3 and (d) PCP4.

**Table S1.** Structural characteristics of PCP determined by BET measurement.

| PCP  | BET surface area<br>(m <sup>2</sup> g <sup>-1</sup> ) | Pore volume<br>(cm <sup>3</sup> g <sup>-1</sup> ) | Pore diameter<br>(nm) |
|------|-------------------------------------------------------|---------------------------------------------------|-----------------------|
| PCP1 | 208                                                   | 0.23                                              | 6.6                   |
| PCP2 | 314                                                   | 0.35                                              | 37.9                  |
| PCP3 | 393                                                   | 0.46                                              | 38.8                  |
| PCP4 | 562                                                   | 0.69                                              | 37.3                  |

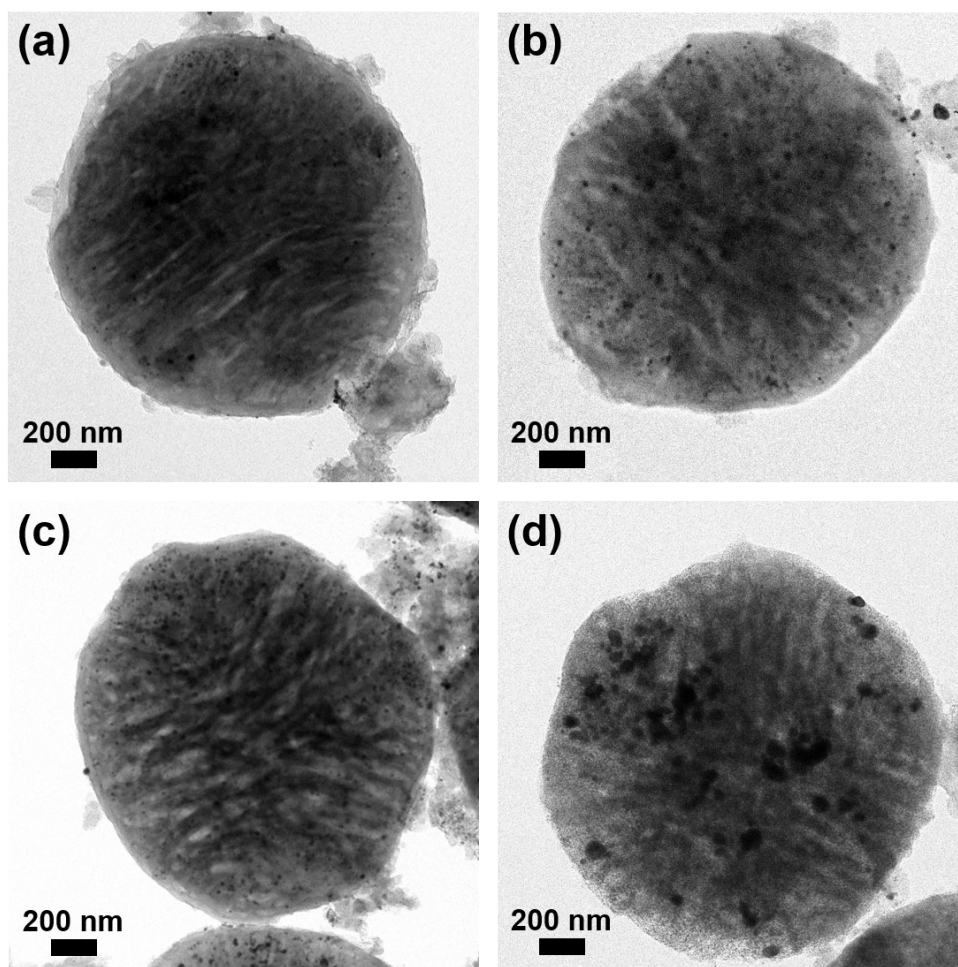

**Fig. S3** TEM images of PCP-PtFe catalysts: (a) PCP1-PtFe, (b) PCP2-PtFe, (c) PCP3-PtFe, and (d) PCP4-PtFe.

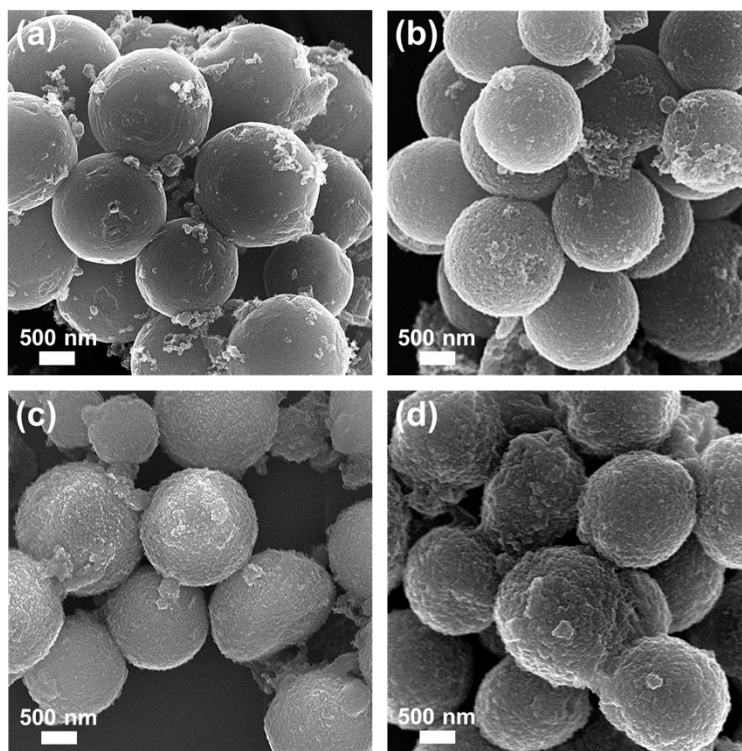

**Fig. S4** SEM images of PCP-PtFe catalysts: (a) PCP1-PtFe, (b) PCP2-PtFe, (c) PCP3-PtFe, and (d) PCP4-PtFe.

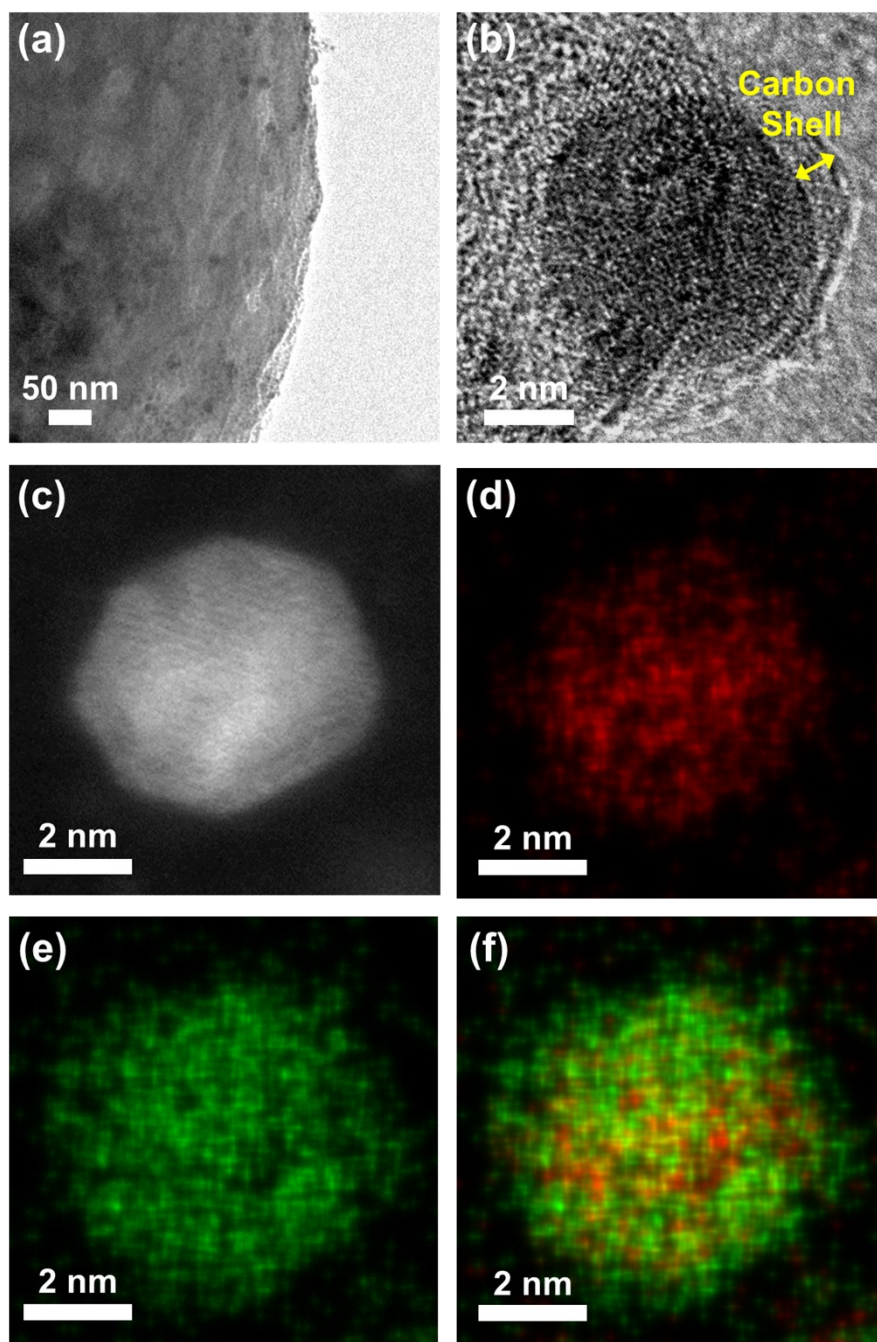

**Fig. S5** (a) TEM image, (b) high-resolution TEM image, (c) HAADF-STEM image, and (d-f) EDS mapping of the PCP4-PtFe catalyst: (d) Pt (red), (e) Fe (green), and (f) their overlay. The observed ratio of Pt and Fe is 1:3.

**Table S2.** Elemental analysis of PCP-PtFe catalyst measured by ICP-OES.

| Catalyst  | Pt (wt%) | Fe (wt%) |
|-----------|----------|----------|
| PCP1-PtFe | 1.31     | 4.74     |
| PCP2-PtFe | 1.32     | 4.57     |
| PCP3-PtFe | 1.37     | 4.79     |
| PCP4-PtFe | 1.29     | 4.76     |

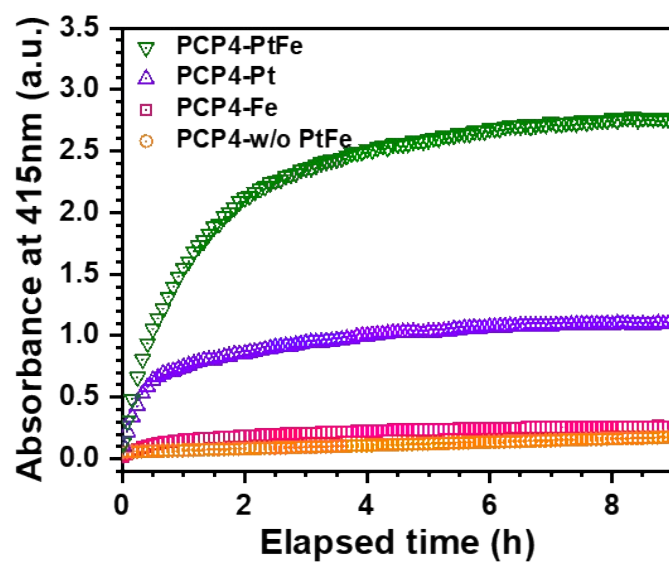

**Fig. S6** UV-Vis absorption spectra of PCP4-PtFe catalyst, PCP4-Pt, PCP4-Fe, and PCP4-w/o PtFe for OPD oxidation.

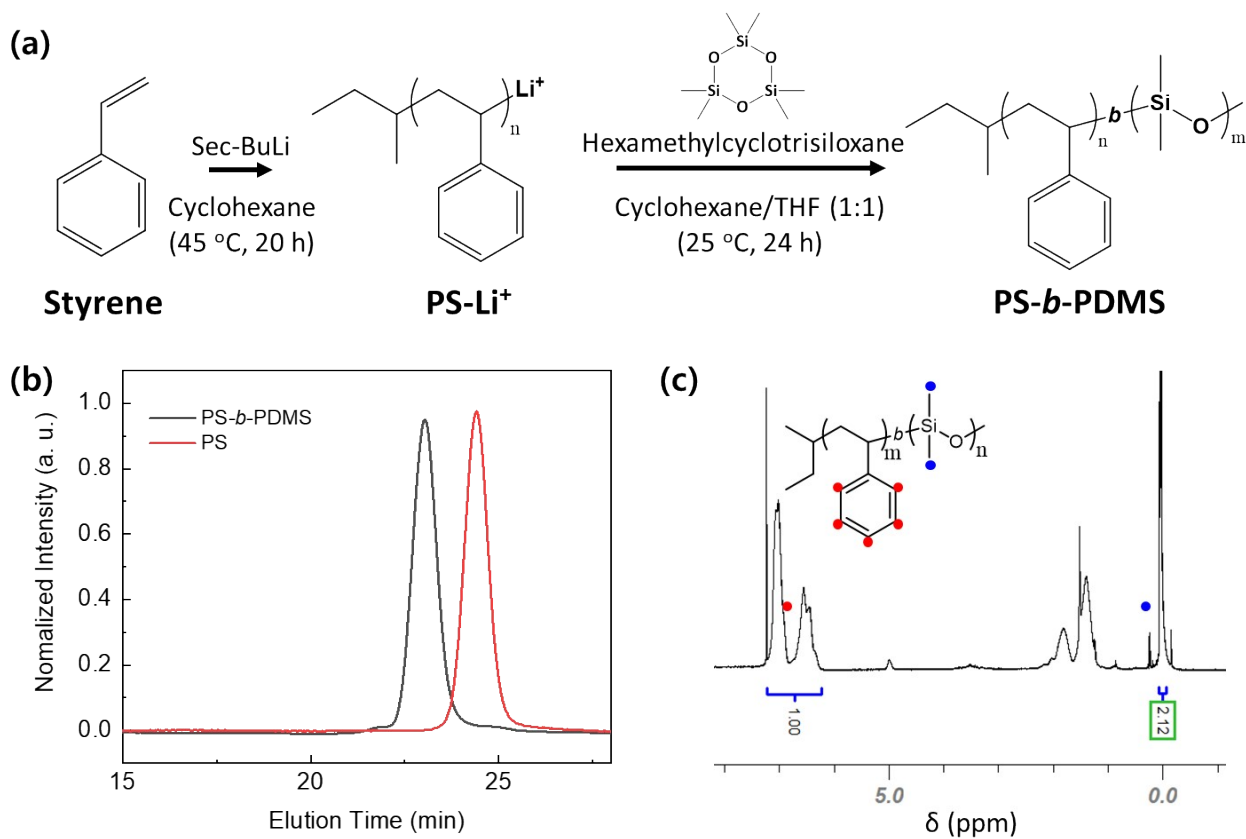

Fi

**g. S7** (a) Scheme for the anionic polymerization, (b) SEC, and (c) <sup>1</sup>H NMR spectra of PS-*b*-PDMS.

## Reference

1. F. Vetr, Z. Moradi-Shoeili, S. Özkar, *Appl. Organomet. Chem.* **2018**, 32, e4465.
